# Supplementary material for: Hydrangea-like nanosheets of Co(OH)2@NiFe-LDH/NF as an efficient electrocatalyst for the oxygen evolution reaction
Source: Royal Society of Chemistry journal article supplement (doi:10.1039/d2se01098d), 2022-01-01
Supplement: d2se01098d1.pdf [file d2se01098d1.pdf]

## Supporting information

# Hydrangea-like nanosheets of $\text{Co(OH)}_2@ \text{NiFe-LDH/NF}$ as efficient electrocatalyst for oxygen evolution reactions

Yufan Qi, ‡<sup>a</sup> Huanhuan Tang, ‡<sup>a</sup> Weijie Zhou,<sup>a</sup> Liying Liu,<sup>a</sup> Yangyang Chen,<sup>a</sup> Lei Hao,<sup>a</sup> Kefen Yue,<sup>\*a</sup> Dongshen Li,<sup>\*b</sup> Yaoyu Wang<sup>a</sup>

<sup>a</sup>. College of Chemistry and Materials Science, Key Laboratory of Synthetic and Natural Functional Molecule of the Ministry of Education, National Demonstration Center for Experimental Chemistry Education, Shaanxi Key Laboratory of Physico-Inorganic Chemistry, Northwest University, Xi'an 710127, People's Republic of China.

\*Ke-fen Yue Email: [ykflyy@nwu.edu.cn](mailto:ykflyy@nwu.edu.cn)

<sup>b</sup>. College of Materials and Chemical Engineering, Hubei Provincial Collaborative Innovation Center for New Energy Microgrid, Key Laboratory of Inorganic Nonmetallic Crystalline and Energy Conversion Materials, China Three Gorges University, No. 8, Daxue Road, Yichang, 443002, China.

\*Dong-Sheng Li Email: [lidongsheng1@126.com](mailto:lidongsheng1@126.com)

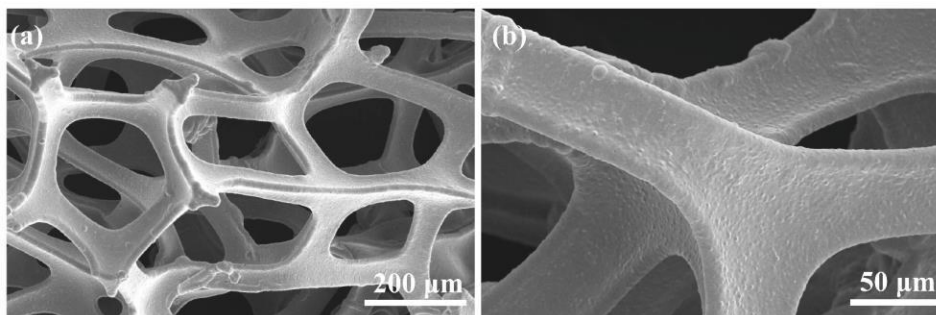

**Fig. S1** (a, b) SEM images of bare NF skeleton at low and high magnification.

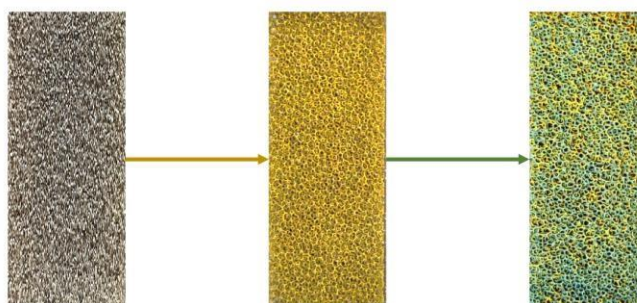

**Fig. S2** The photos of bare NF, NiFe-LDH/NF and Co(OH)<sub>2</sub>@NiFe-LDH/NF.

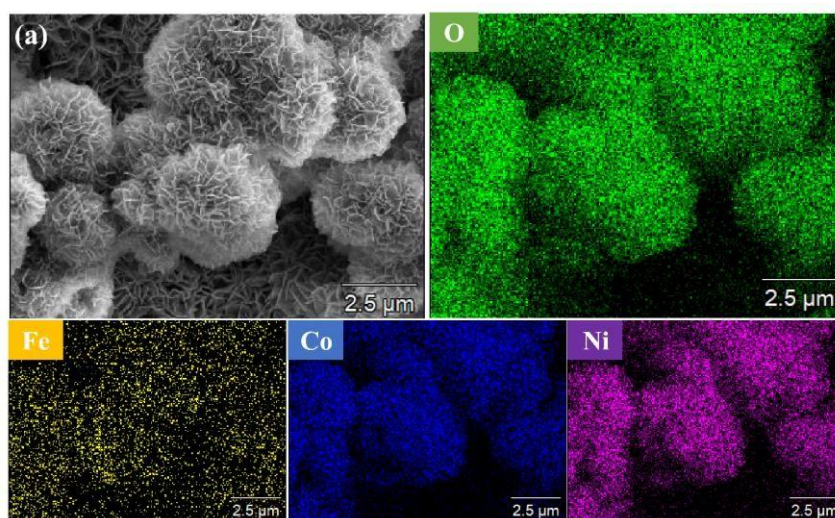

**Fig. S3** EDS mapping images of the of Co(OH)<sub>2</sub>@NiFe-LDH/NF.

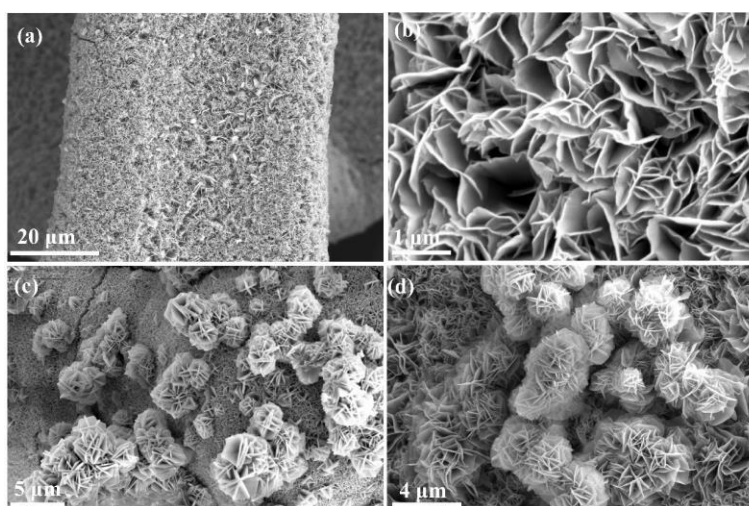

**Fig. S4** SEM images of (a, b)  $\text{Co(OH)}_2/\text{NF}$  at low and high magnification, (c)  $\text{NiFe-LDH/NF}$  and (d)  $\text{Co(OH)}_2@\text{NiFe-LDH/NF}$ .

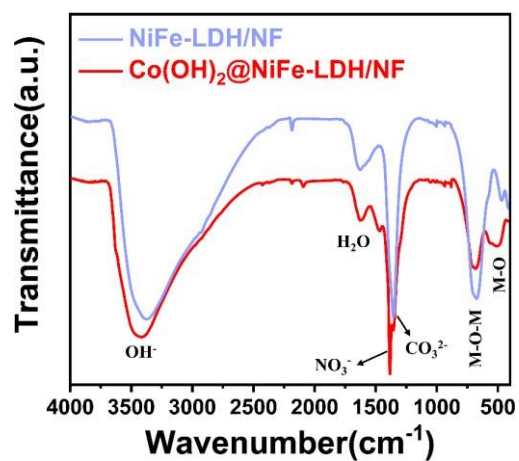

**Fig. S5** FT-IR spectra of  $\text{NiFe-LDH/NF}$  and  $\text{Co(OH)}_2@\text{NiFe-LDH/NF}$ .

**Table. S1** The simulated series resistance ( $R_s$ ) and charge transfer resistance ( $R_{ct}$ ) values based on the fitting models.

| Samples                              | $R_s$ ( $\Omega$ ) | $R_{ct}$ ( $\Omega$ ) |
|--------------------------------------|--------------------|-----------------------|
| bare NF                              | 1.293              | 76.57                 |
| $\text{Co(OH)}_2/\text{NF}$          | 1.367              | 11.13                 |
| $\text{NiFe-LDH/NF}$                 | 1.413              | 1.08                  |
| $\text{Co(OH)}_2@\text{NiFe-LDH/NF}$ | 1.325              | 0.63                  |

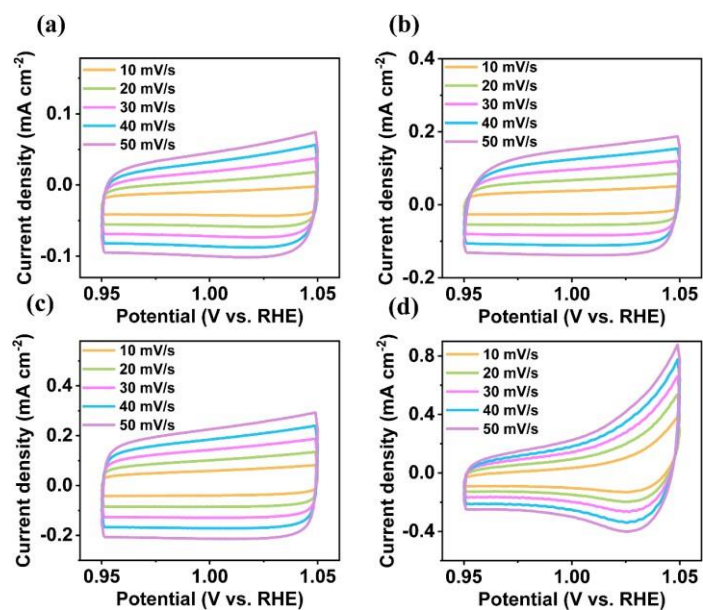

**Fig. S6** Cyclic voltammograms of (a) bare NF, (b)  $\text{Co(OH)}_2/\text{NF}$ , (c)  $\text{NiFe-LDH}/\text{NF}$  and (d)  $\text{Co(OH)}_2@/\text{NiFe-LDH}/\text{NF}$  with different scan rates.

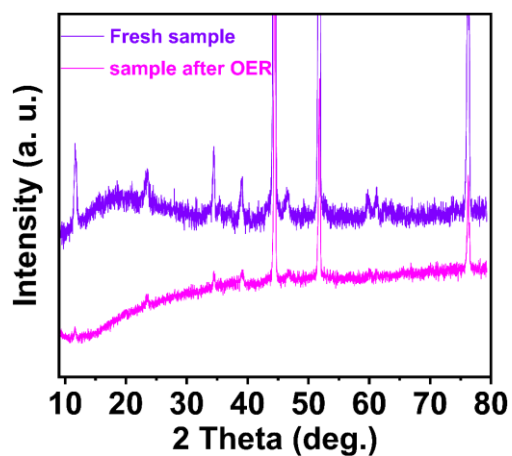

**Fig. S7** XRD patterns of  $\text{Co(OH)}_2@/\text{NiFe-LDH}/\text{NF}$  before and after OER testing.

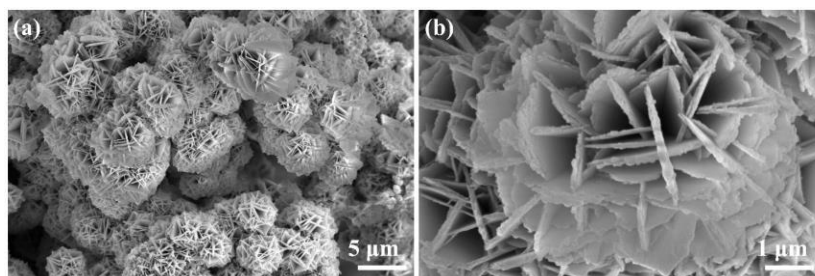

**Fig. S8** SEM images of after OER testing.

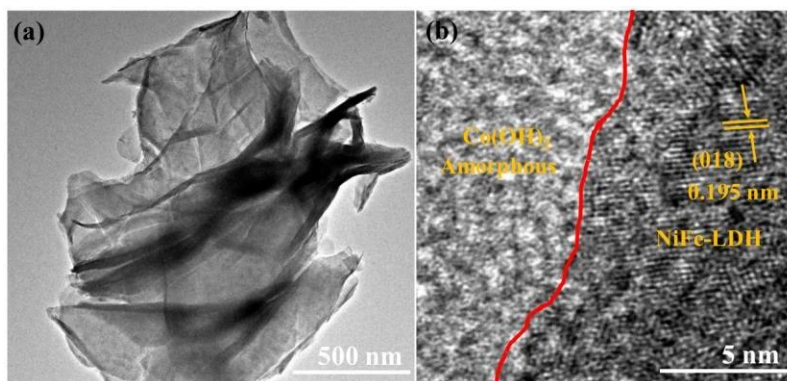

Fig. S9 TEM images of  $\text{Co(OH)}_2@$ NiFe-LDH/NF after OER testing.

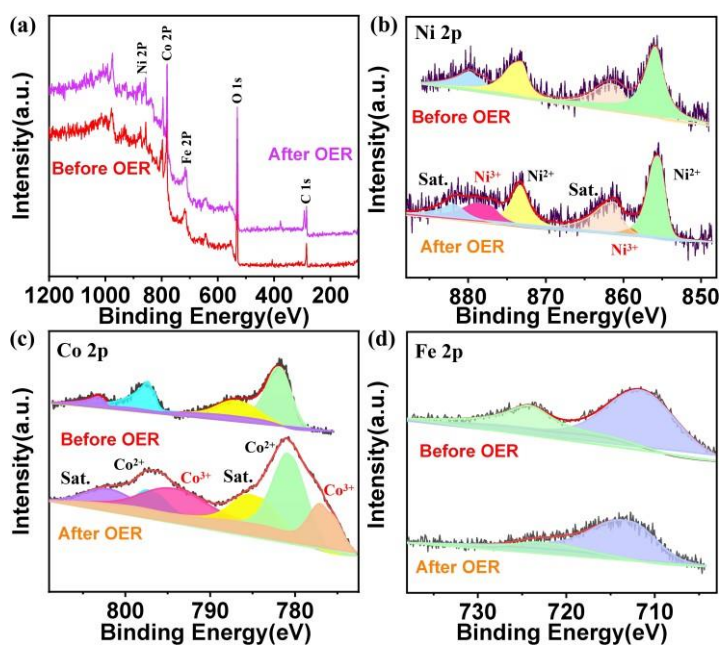

Fig. S10 XPS spectra of  $\text{Co(OH)}_2@$ NiFe-LDH/NF before and after OER test.

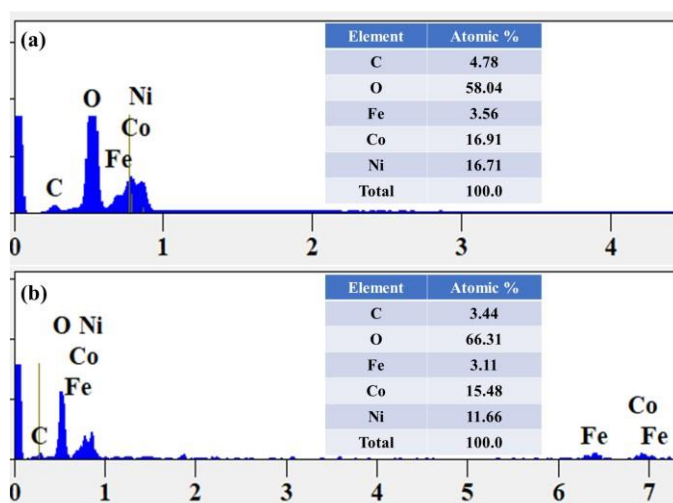

Fig. S11 EDS of  $\text{Co(OH)}_2@$ NiFe-LDH/NF (a) before and (b) after OER test.

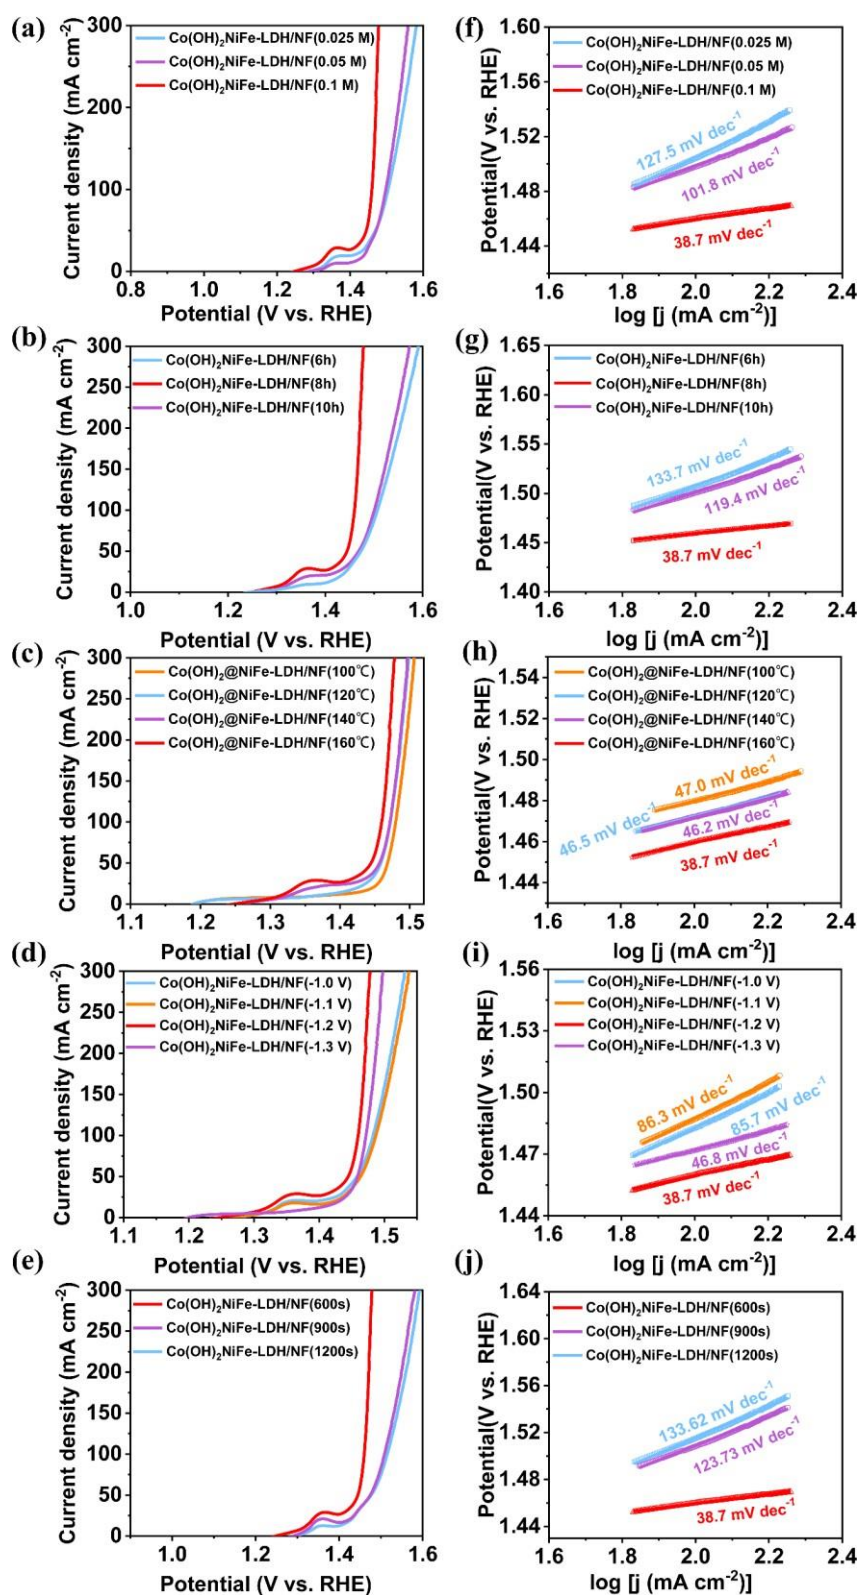

Fig. S12 a-e (Left) and f-j (Right) Polarization curves and Tafel plots of different conditions.

**Table. S2** A comparison of the catalytic OER performance of recently reported catalysts in 1 M KOH solution.

| Catalysts                                     | Electrolyte   | J / (mA m <sup>-2</sup> ) | $\eta_j$ / (mV)    | Ref              |
|-----------------------------------------------|---------------|---------------------------|--------------------|------------------|
| <b>Co(OH)<sub>2</sub>@NiFe-LDH/NF</b>         | <b>1M KOH</b> | <b>50<br/>100</b>         | <b>209<br/>229</b> | <b>This work</b> |
| NiSe@CoFe LDH/NF                              | 1M KOH        | 100                       | 236                | 1                |
| Ni-Fe-W LDH/NF                                | 1M KOH        | 100                       | 247                | 2                |
| NiFeCoP/NF                                    | 1M KOH        | 100                       | 244.2              | 3                |
| FeOOH/NiFe/NF                                 | 1M KOH        | 100                       | 290                | 4                |
| NiCoP@NiMn LDH/NF                             | 1M KOH        | 100                       | 293                | 5                |
| NiFe-60/Co <sub>3</sub> O <sub>4</sub> @NF    | 1M KOH        | 50                        | 221                | 6                |
| cMOF/LDH                                      | 1M KOH        | 50                        | 217                | 7                |
| CoMoP/NiFe-LDH/NF                             | 1M KOH        | 50                        | 225                | 8                |
| NiFe-LDH-Vo@NiCu                              | 1M KOH        | 50                        | 244                | 9                |
| Nb-NiFe-LDH                                   | 1M KOH        | 50                        | 242                | 10               |
| NiFe-PO <sub>x</sub> /NF                      | 1M KOH        | 50                        | 247                | 11               |
| Ni <sub>3</sub> S <sub>2</sub> -NiFe LDHs /NF | 1M KOH        | 50                        | 230                | 12               |
| CoO@NiFe-LDH/NF                               | 1M KOH        | 20                        | 225                | 13               |
| Ru/NiFe LDH-F/NF                              | 1M KOH        | 10                        | 230                | 14               |
| NiFeMn-LDH                                    | 1M KOH        | 10                        | 310                | 15               |
| CoFeV LDH/NF                                  | 1M KOH        | 10                        | 242                | 16               |
| CoO-Co <sub>4</sub> N@NiFe-LDH                | 1M KOH        | 10                        | 231                | 17               |

## References

1. F. Nie, Z. Li, X. Dai, X. Yin, Y. Gan, Z. Yang, B. Wu, Z. Ren, Y. Cao and W. Song, *Chem. Eng. J.*, 2022, **431**, 134080.
2. L. Wu, L. Yu, F. Zhang, D. Wang, D. Luo, S. Song, C. Yuan, A. Karim, S. Chen and Z. Ren, *J. Mater. Chem. A*, 2020, **8**, 8096-8103.
3. J. Cen, L. Wu, Y. Zeng, A. Ali, Y. Zhu and P. K. Shen, *ChemCatChem*, 2021, **13**, 4602-4609.
4. J. Chi, H. Yu, G. Jiang, J. Jia, B. Qin, B. Yi and Z. Shao, *J. Mater. Chem. A*, 2018, **6**, 3397-3401.
5. P. Wang, J. Qi, X. Chen, C. Li, W. Li, T. Wang and C. Liang, *ACS Appl. Mater. Interfaces*, 2019, **12**, 4385-4395.
6. J. Lv, L. W, R. Li, K. Zhang, D. Zhao, Y. Li, X. Li, X. Huang, and G. Wang, *ACS Catal.*, 2021, **11**, 14338-14351.
7. Y. Wang, L. Yan, K. Dastafkan, C. Zhao, X. Zhao, Y. Xue, J. Huo, S. Li and Q. Zhai, *Adv. Mater.*, 2021, **33**, e2006351.
8. W. Mai, Q. Cui, Z. Zhang, K. Zhang, G. Li, L. Tian and W. Hu, *ACS Appl. Energy Mater.*, 2020, **3**, 8075-8085.
9. H. Su, J. Jiang, N. Li, Y. Gao and L. Ge, *Chem. Eng. J.*, 2022, **446**, 137226.
10. Y. Zhou, F. Wang, S. Dou, Z. Shi, B. Dong, W. Yu, H. Zhao, F. Wang, J. Yu and Y. Chai, *Chem. Eng. J.*, 2022, **427**, 131643.
11. S. Song, J. Zang, S. Zhou, H. Gao, X. Tian, Y. Yuan, W. Li and Y. Wang, *Electrochim. Acta*, 2021, **392**, 138996.
12. S. Wu, S. Liu, X. Tan, W. Zhang, K. Cadien and Z. Li, *Chem. Eng. J.*, 2022, **442**, 136105.
13. Z. Wang, J. Zhang, Q. Yu, H. Yang, X. Chen, X. Yuan, K. Huang and X. Xiong, *Chem. Eng. J.*, 2021, **410**, 130123.
14. Y. Wang, P. Zheng, M. Li, Y. Li, X. Zhang, J. Chen, X. Fang, Y. Liu, X. Yuan, X. Dai and H. Wang, *Nanoscale*, 2020, **12**, 9669-9679.
15. Z. Lu, L. Qian, Y. Tian, Y. Li, X. Sun and X. Duan, *Chem. Commun. (Camb)*, 2016, **52**, 908-911.
16. Y. Hu, Z. Wang, W. Liu, L. Xu, M. Guan, Y. Huang, Y. Zhao, J. Bao and H. Li, *ACS Sustain. Chem. Eng.*, 2019, **7**, 16828-16834.
17. B. Chen, M. Humayun, Y. Li, H. Zhang, H. Sun, Y. Wu and C. Wang, *ACS Sustain. Chem. Eng.*, 2021, **9**, 14180-14192.
